# Supplementary material
Source: Springer Nature journal article supplement (https://www.springermedizin.de/resource/supplementary/40170_2013_18_MOESM11_ESM.pdf/25787602)

## A Cytosolic Glycolysis

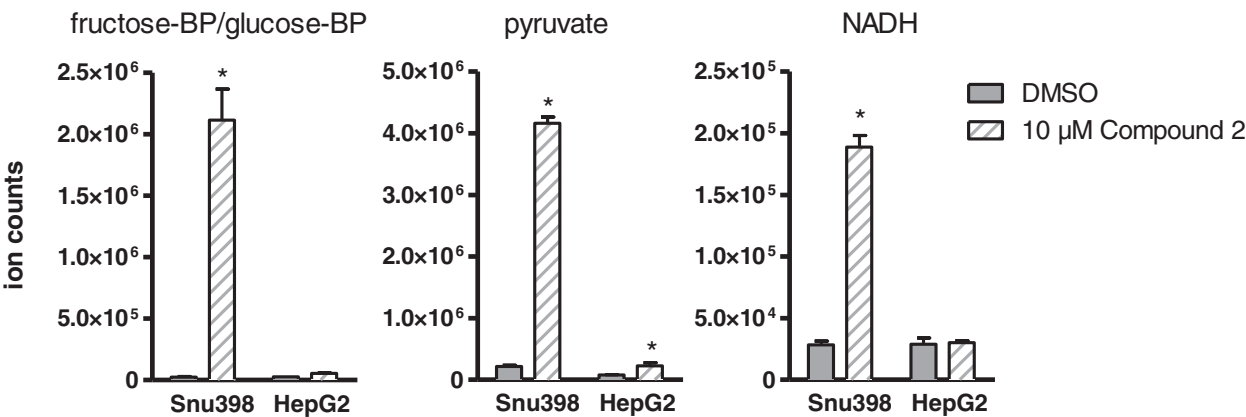

## B Citric Acid Cycle

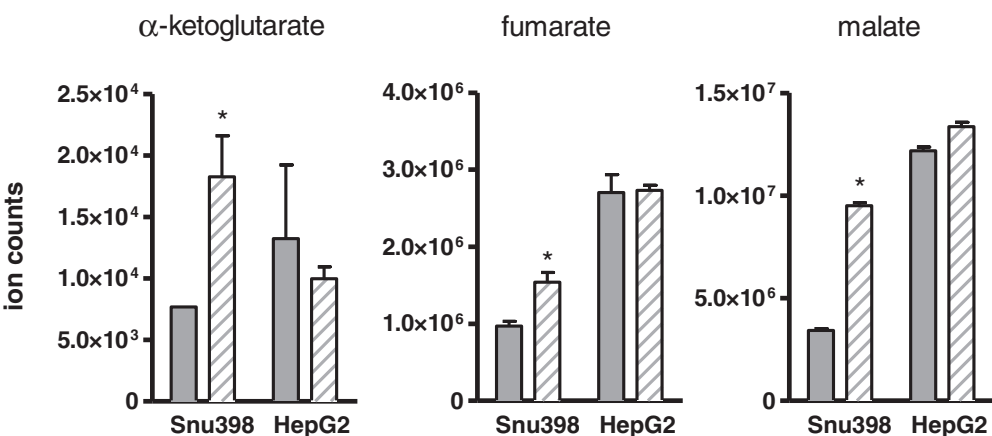

## C Carnitine Metabolism and Pentose Phosphate Pathway

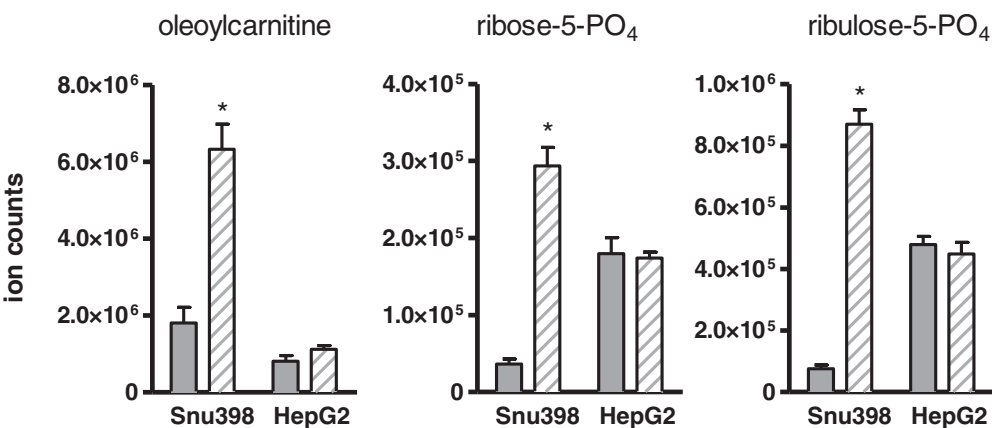

Supplement: MOESM11 [file 25787602]
